# Supplementary material for: Cross-sectional and longitudinal studies suggest pharmacological treatment used in patients with glucokinase mutations does not alter glycaemia
Source: Springer Nature journal article supplement (doi:10.1007/s00125-013-3075-x), 2013-10-03
Supplement: MOESM1 [file 8091914]

ESM Table 1: Characteristics of patients with a heterozygous mutation in the *GCK* gene receiving no pharmacological treatment, OHA or insulin at time of *GCK* mutation testing. \*BMI in children and adolescents adjusted to adult equivalent based on UK growth centiles.

|                                               | OHA                                          | Insulin                                      | No treatment                                | p<br>(treated v<br>non-treated) |
|-----------------------------------------------|----------------------------------------------|----------------------------------------------|---------------------------------------------|---------------------------------|
| Median age at diagnosis (y) (IQR)             | 28 (18, 43)                                  | 20 (8, 29)                                   | 17 (11, 30)                                 | <0.0001                         |
| Median BMI* at test (IQR) / kg/m <sup>2</sup> | 25.6 (22.3, 30.2)                            | 23.0 (21.0, 24.5)                            | 23.1 (21.0, 26.0)                           | 0.015                           |
| Median HbA <sub>1c</sub> at test (IQR)        | 48 (43, 52)<br>mmol/mol<br>[6.5% (6.1, 6.9)] | 45 (42, 49)<br>mmol/mol<br>[6.3% (6.0, 6.6)] | 46 (43, 50)<br>mmol/mol<br>[6.4 (6.1, 6.7)] | 0.11                            |
