# Supplementary material for: Cross-sectional and longitudinal studies suggest pharmacological treatment used in patients with glucokinase mutations does not alter glycaemia
Source: Springer Nature journal article supplement (doi:10.1007/s00125-013-3075-x), 2013-10-03
Supplement: MOESM2 [file 8091914]

ESM Table 2: Median (IQR) HbA<sub>1c</sub> on treatment and after discontinuing treatment following the detection of a *GCK* mutation.

| Treatment pre <i>GCK</i> mutation testing | n  | Median (IQR) HbA <sub>1c</sub> pre genetic test (on treatment/no treatment) | Median (IQR) HbA <sub>1c</sub> post genetic test (off treatment/at follow-up) | Median (IQR) absolute change in HbA <sub>1c</sub> | p=  |
|-------------------------------------------|----|-----------------------------------------------------------------------------|-------------------------------------------------------------------------------|---------------------------------------------------|-----|
| None                                      | 18 | 46 (42, 50)<br>mmol/mol<br>[6.4% (6.0, 6.7)]                                | 46 (44, 50)<br>mmol/mol<br>[6.4% (6.2, 6.7)]                                  | 1.1 (-1.1, 3.6)<br>mmol/mol<br>[0.1 (-0.1, 0.3)]  | 0.2 |
| OHA                                       | 6  | 46 (43, 50)<br>mmol/mol<br>[6.4% (6.1, 6.8)]                                | 45 (45, 47)<br>mmol/mol<br>[6.3% (6.3, 6.5)]                                  | 0 (-3.3, 2.5)<br>mmol/mol<br>[0% (-0.3, 0.2)]     | 0.9 |
| Insulin                                   | 10 | 47 (45, 50)<br>mmol/mol<br>[6.5% (6.3, 6.7)]                                | 45 (42, 52)<br>mmol/mol<br>[6.3% (6.0, 7.0)]                                  | 0.5 (-5.5, 2.2)<br>mmol/mol<br>[0.1% (-0.5, 0.2)] | 0.7 |
| OHA & insulin combined                    | 16 | 47 (44, 50)<br>mmol/mol<br>[6.5% (6.2, 6.7)]                                | 45 (44, 51)<br>mmol/mol<br>[6.3% (6.2, 6.8)]                                  | 0 (-5.5, 2.2)<br>mmol/mol<br>[0 % (-0.5, 0.2)]    | 0.5 |
