# Supplementary material for: Cross-sectional and longitudinal studies suggest pharmacological treatment used in patients with glucokinase mutations does not alter glycaemia
Source: Springer Nature journal article supplement (doi:10.1007/s00125-013-3075-x), 2013-10-03
Supplement: MOESM3 [file 8091914]

ESM Table 3: Clinical characteristics of patients in the longitudinal treatment discontinuation study compared with the entire cohort of patients with GCK-MODY. This shows that those patients followed-up are representative of the entire cohort.

| Clinical Characteristic                          | In Longitudinal therapy discontinuation cohort | In those without follow-up data                 | p-value |
|--------------------------------------------------|------------------------------------------------|-------------------------------------------------|---------|
| Age                                              | Median = 27 (IQR 11, 32)<br>(n=16)             | median = 27 (IQR 13, 40)<br>(n= 1030)           | p=0.3   |
| BMI (child values corrected to adult equivalent) | Median = 22.4 (20.6, 26.5)<br>(n=9)            | No follow up: n=527<br>median 23.5 (21.2, 26.3) | p=0.7   |
| Age at diagnosis                                 | Median 14 (9, 25)<br>(n=15)                    | Median 20 (12, 31)<br>(n=805)                   | p=0.1   |
| Sex                                              | 6/16 males                                     | 451/1113 males                                  | p=0.8   |
